# Supplementary material for: Hierarchical chirality observed from chiral supramolecular assembling of racemic and enantiopure helicene derivatives on silica nanohelix surfaces
Source: Royal Society of Chemistry journal article supplement (doi:10.1039/d4nr04292a), 2024-12-18

*Supplementary Information*

**Hierarchical chirality observed from chiral supramolecular  
assembling of racemic and enantiopure helicene derivatives on  
silica nanohelix surfaces**

Nanami Hano<sup>a,b,c</sup>, Nicolas Zigon<sup>d</sup>, Balamurugan Kuppan<sup>a</sup>, Ludmilla Sturm<sup>e</sup>,  
Nicolas Vanthuyne<sup>f</sup>, Emilie Pouget<sup>a</sup>, Sylvain Nlate<sup>a</sup>, Harald Bock<sup>e</sup>, Fabien  
Durola<sup>e</sup>, Narcis Avarvari<sup>d</sup>, and Reiko Oda <sup>\*a,c,g</sup>

<sup>a</sup> CBMN, CNRS, UMR 5248, University of Bordeaux, 33600 Pessac, France

<sup>b</sup> Faculty of Advanced Science and Technology, Kumamoto University, 2-39-1 Kurokami,  
Chuo-ku, Kumamoto 860-8555, Japan

<sup>c</sup> International Research Organization for Advanced Science and Technology (IROAST),  
Kumamoto University, 2-39-1 Kurokami, Chuo-ku, Kumamoto 860-8555, Japan

<sup>d</sup> Univ Angers, CNRS, MOLTECH-Anjou, SFR MATRIX, F-49000 Angers, France

<sup>e</sup> CRPP, CNRS, University of Bordeaux, 115 avenue Schweitzer, 33600 Pessac., France

<sup>f</sup> Aix Marseille Univ, CNRS, Centrale Med, FSCM, Marseille, France

<sup>g</sup> WPI-Advanced Institute for Materials Research, Tohoku University, Katahira, Aoba-Ku,  
980-8577 Sendai, Japan

Tel: +33 (0)5 4000 2229; E-mail: reiko.oda@u-bordeaux.fr

Figure S1

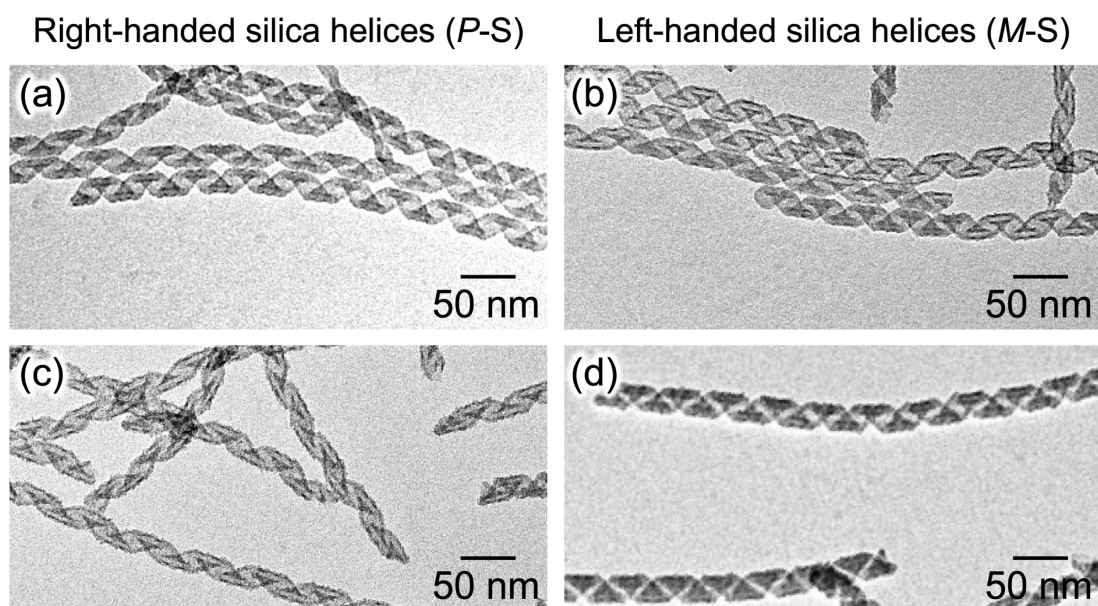

Figure S1. TEM images of silica nanoelices prepared from gemini surfactant with L- or D-tartrate before (a, b) and after (c, d) modification of (3-Aminopropyl) triethoxysilane (APTES).

Figure S2

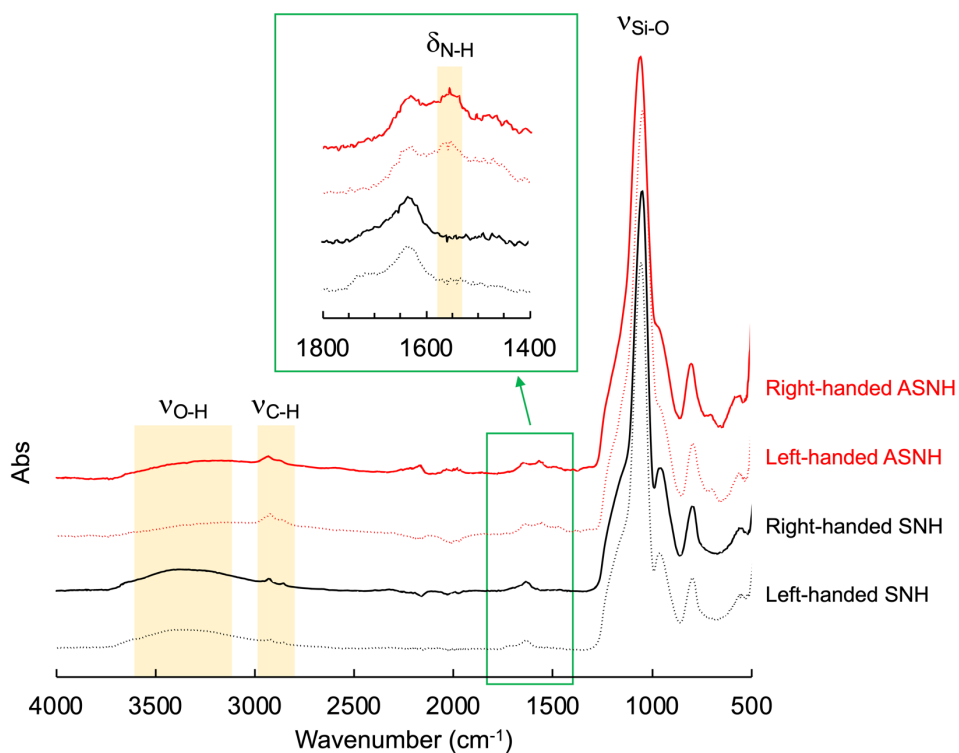

Figure S2. ATR-FTIR spectra of silica nanoelices before (SNH) and after (ASNH) modification of APTES.

**Figure S3**

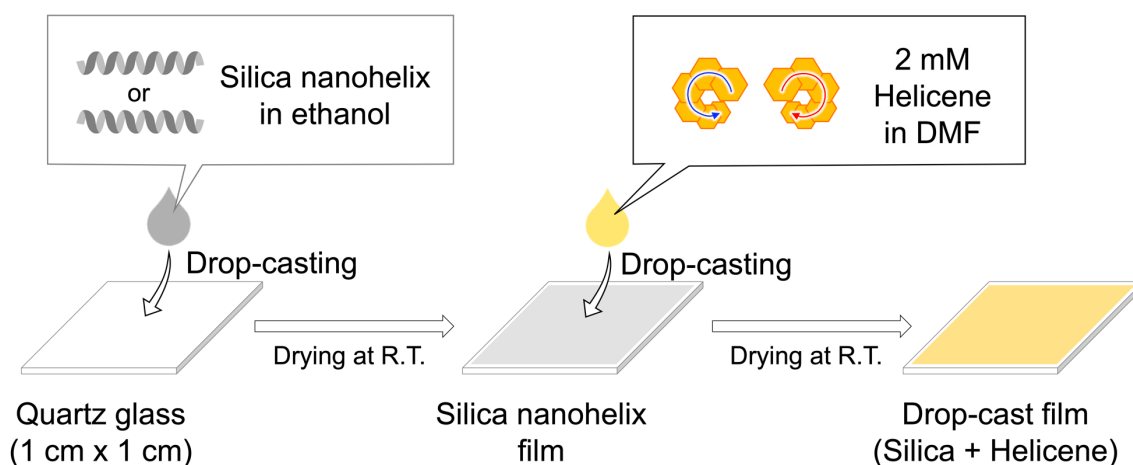

**Figure S3.** Schematic illustration of preparation process of drop-cast films.

**Figure S4**

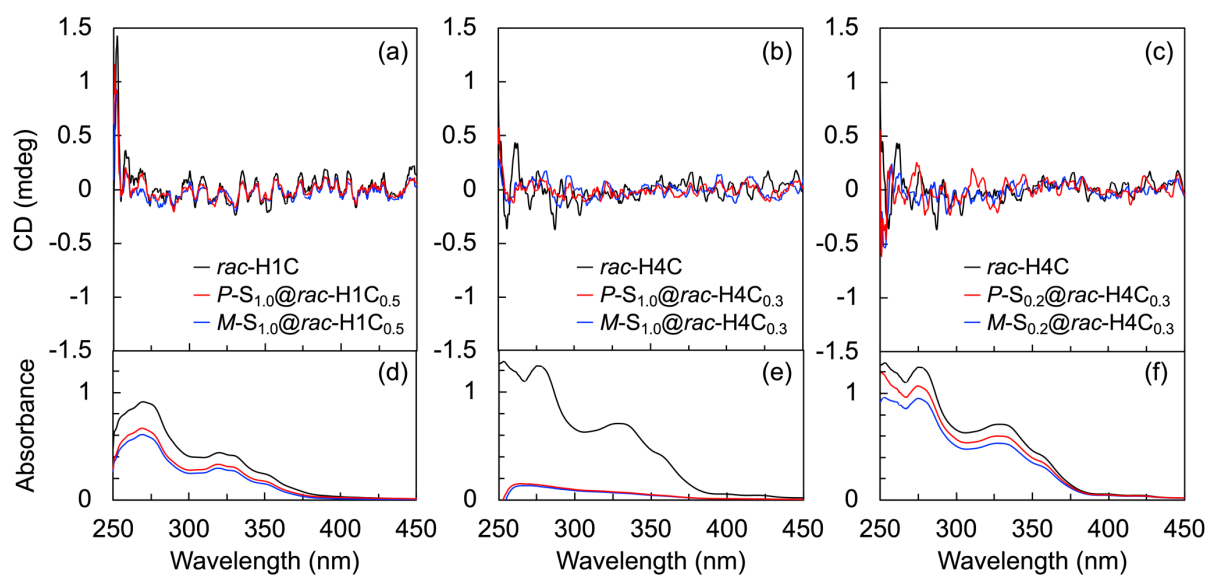

**Figure S4.** CD (a, b, c) and UV-vis absorption (d, e, f) spectra of supernatant of ASNH and helicenes mixture. (a, d) ASNH: 1.0 mg/mL, *rac*-H1C: 0.5 mM, (b, e) ASNH: 1.0 mg/mL, *rac*-H4C: 0.3 mM and (c, f) ASNH: 0.2 mg/mL, *rac*-H4C: 0.3 mM

**Figure S5**

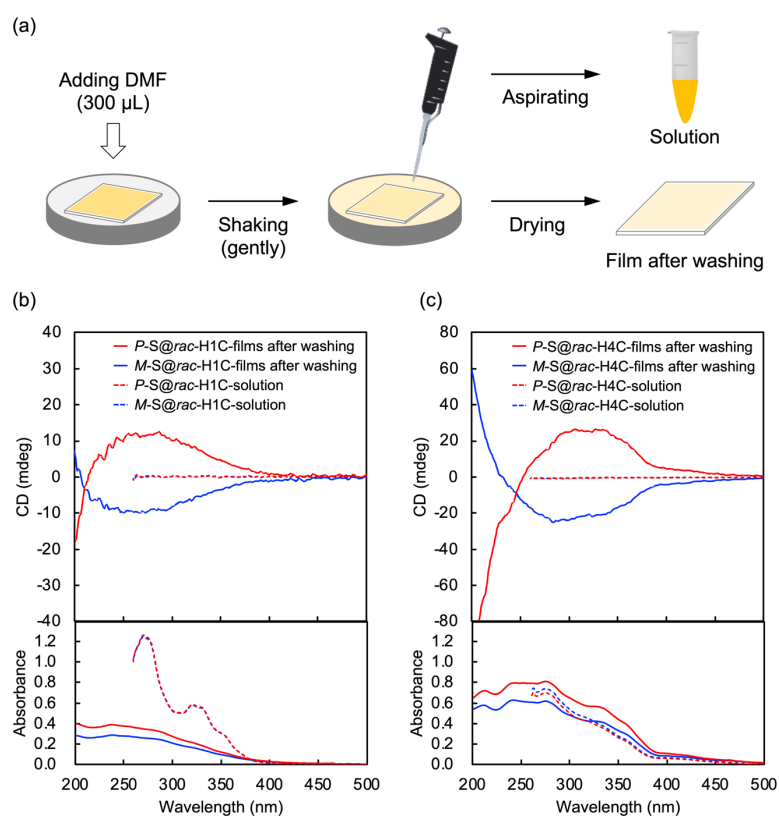

**Figure S5.** (a) Schematic illustration of washing process of drop-cast films and (b, c) CD and UV-vis absorption spectra of the drop-cast films and the solution after washing drop-cast films. (b) *rac*-H1C, (c) *rac*-H4C

**Figure S6**

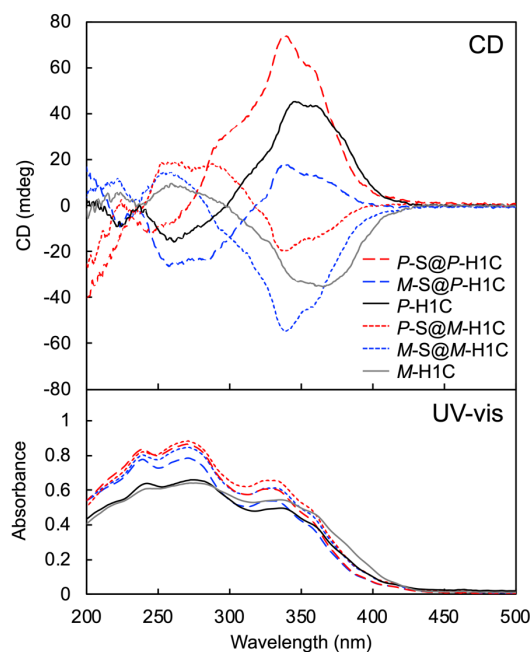

**Figure S6.** DRCD and UV-vis absorption spectra of drop-cast films prepared with and without ASNH and enantiomer H1C (*P*-H1C or *M*-H1C).

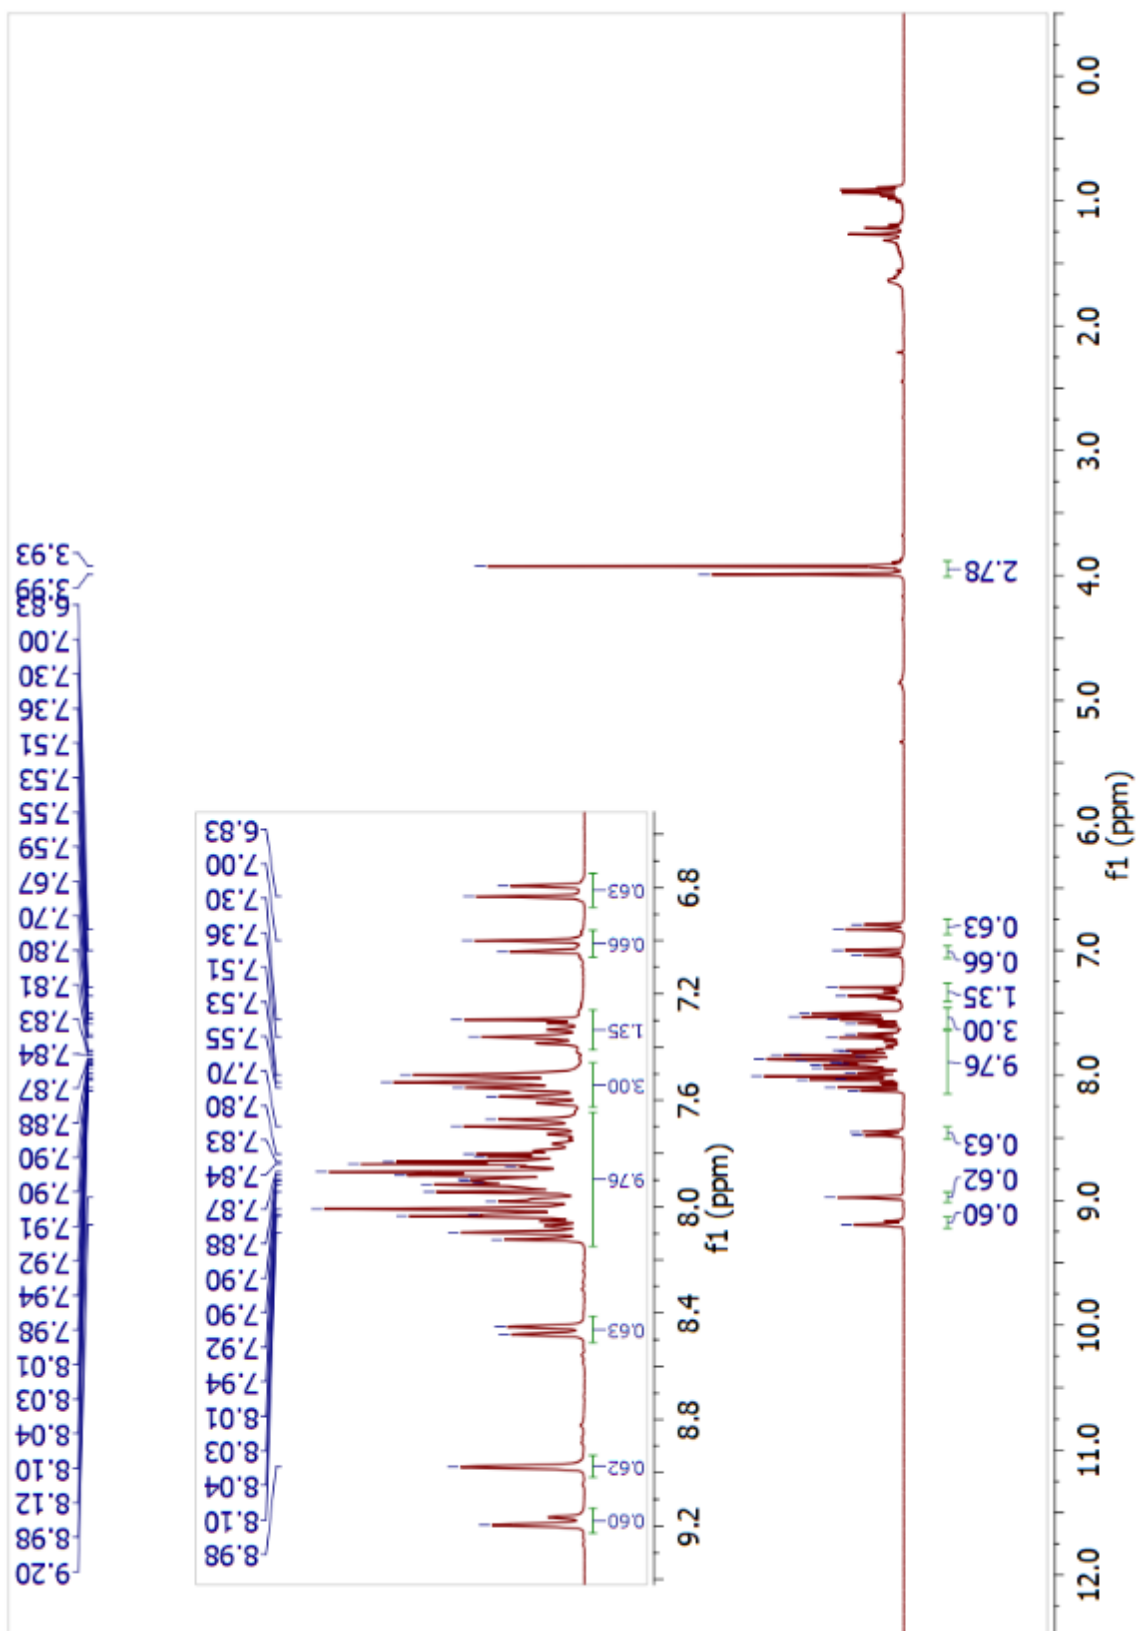

Figure S7.  $^1\text{H}$  NMR (300 MHz,  $\text{CDCl}_3$ ) spectra of Methyl (E/Z)-[4]helicene-4-vinylbenzoate.

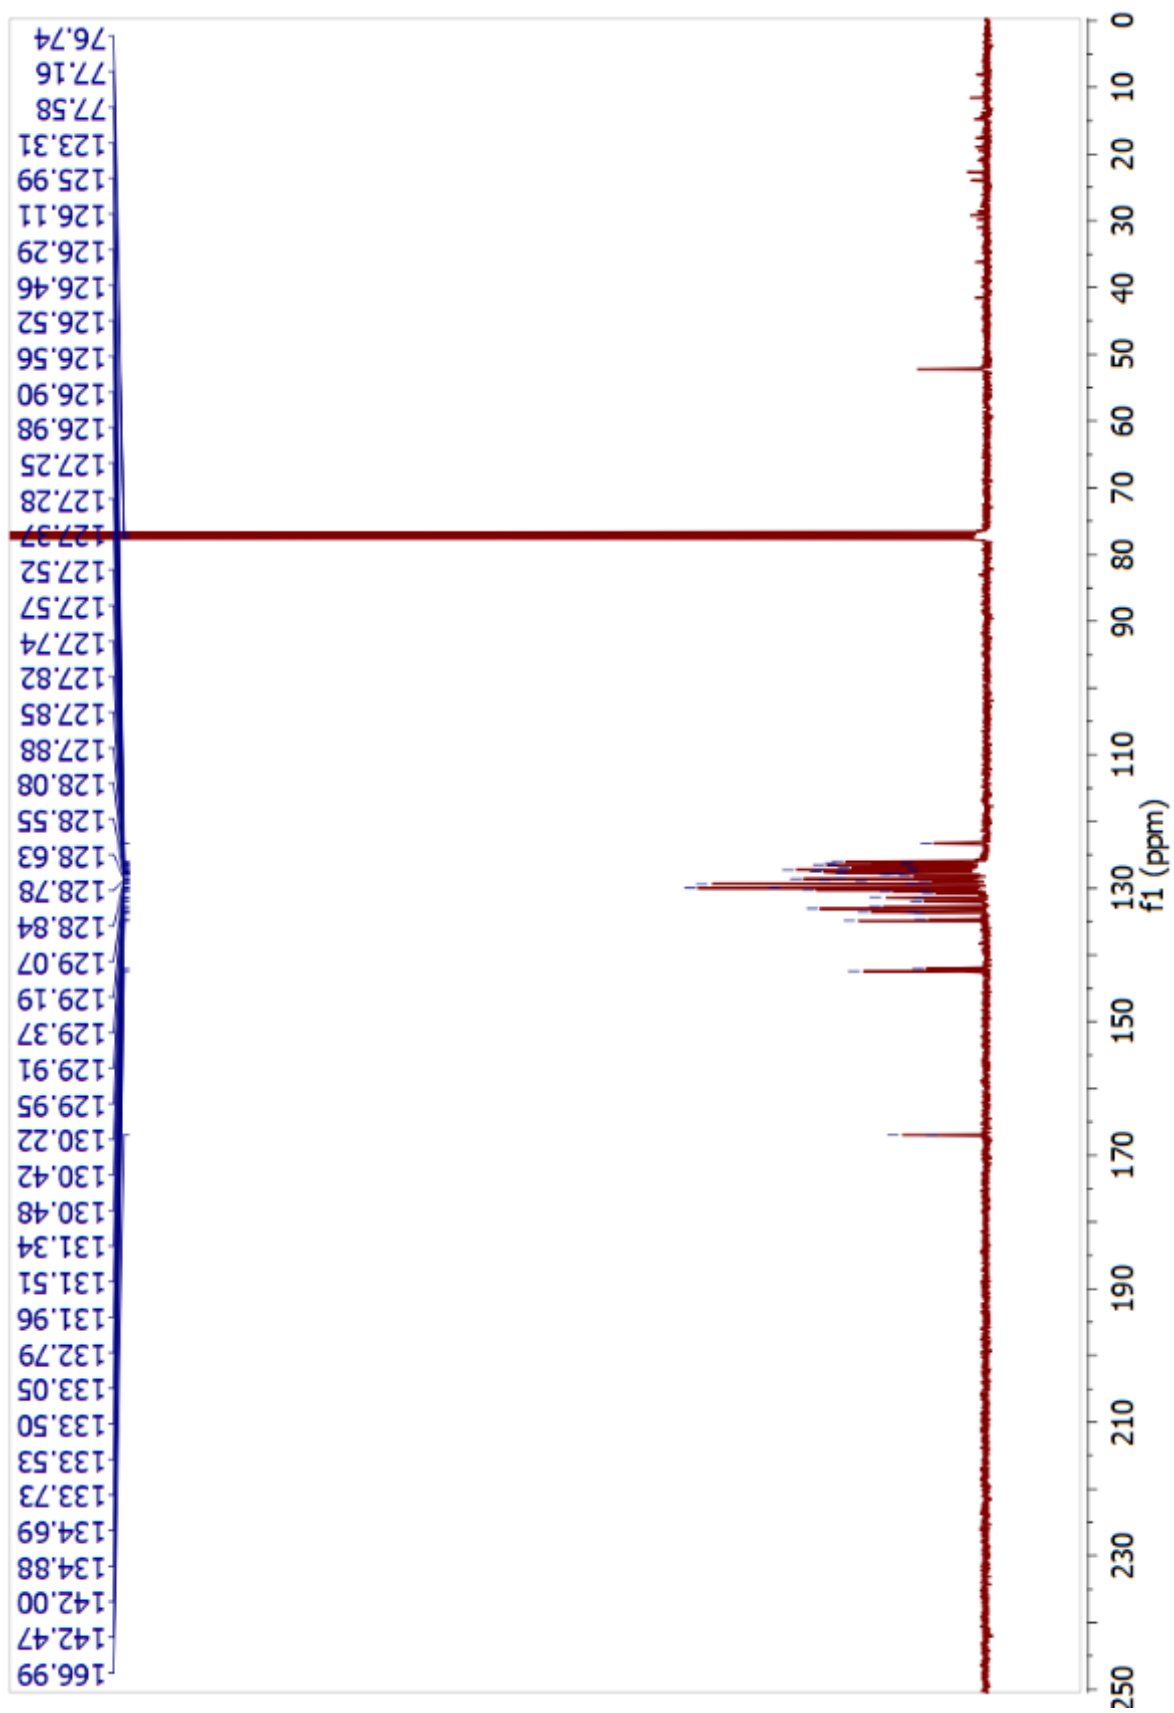

Figure S8.  $^{13}\text{C}$  NMR (75 MHz,  $\text{CDCl}_3$ ) spectra of Methyl (E/Z)-[4]helicene-4-vinylbenzoate.

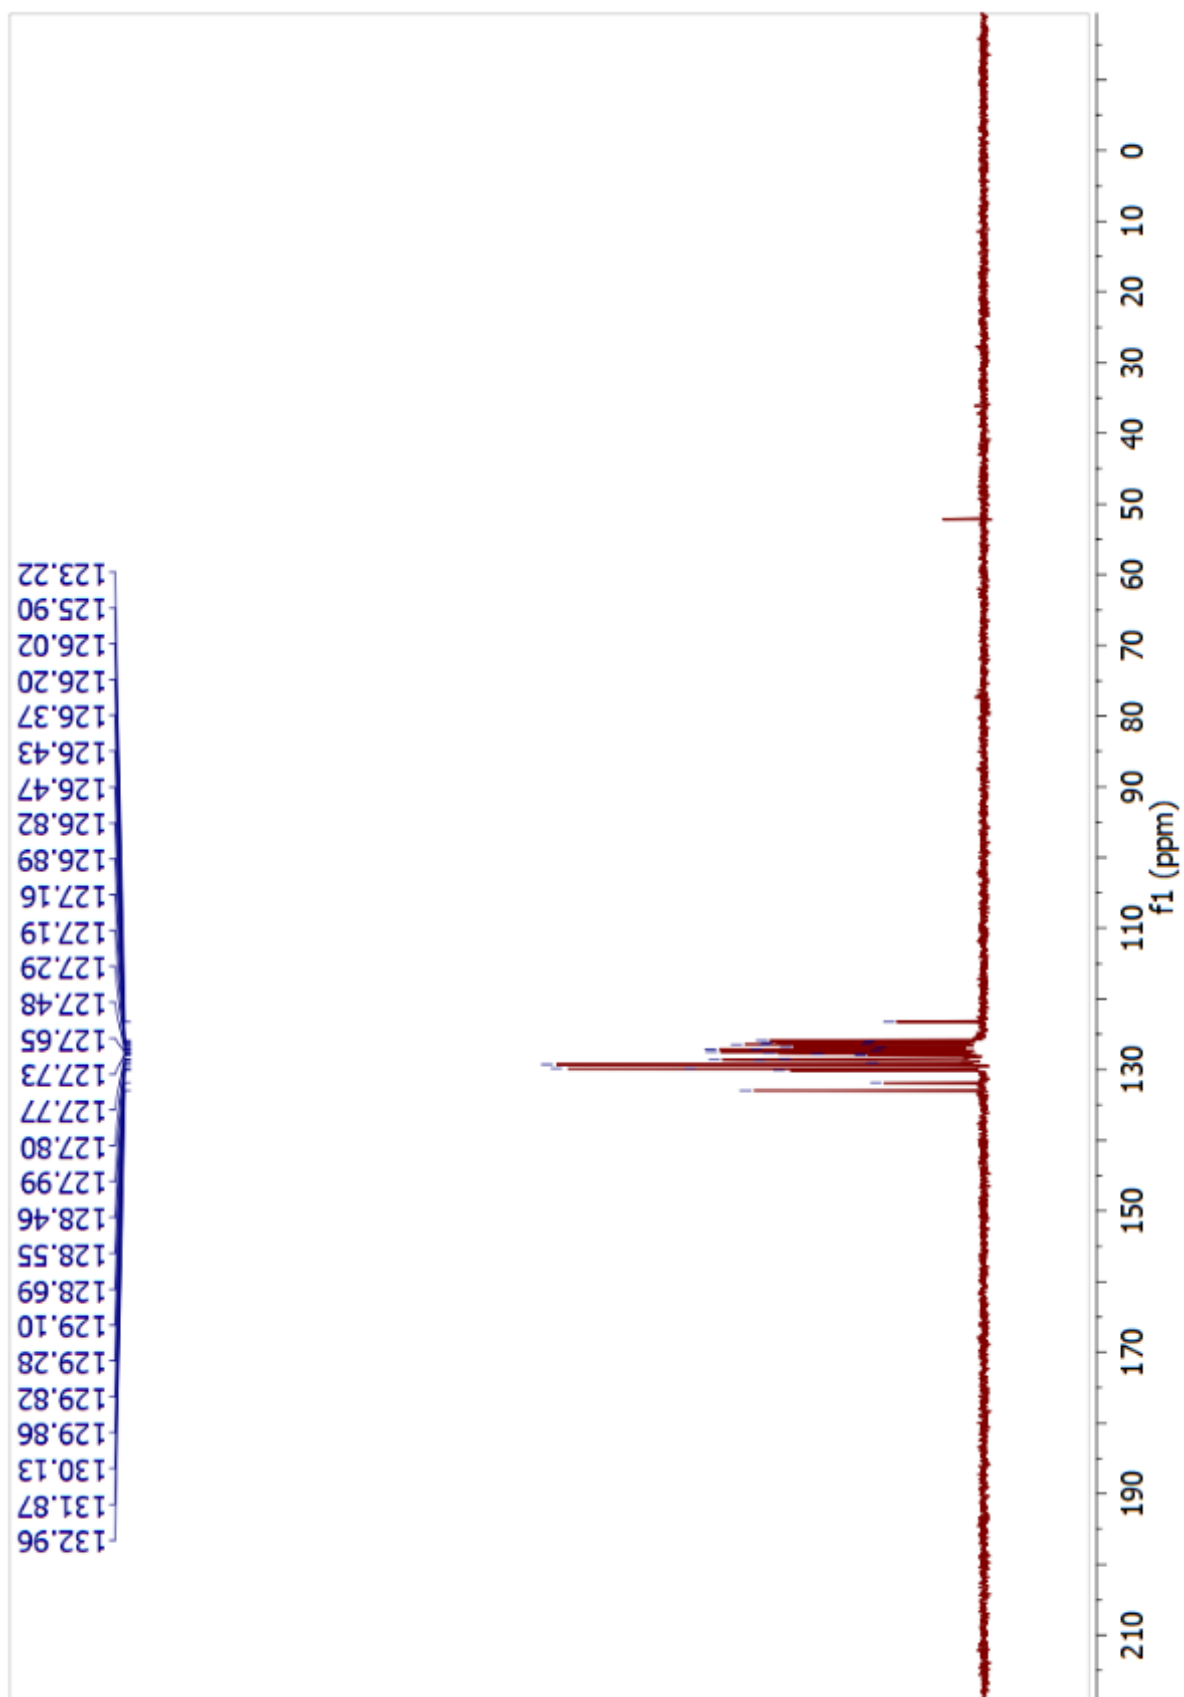

**Figure S9.**  $^{13}\text{C}$ -DEPT135 NMR (75 MHz,  $\text{CDCl}_3$ ) spectra of Methyl (E/Z)-[4]helicene-4-vinylbenzoate.

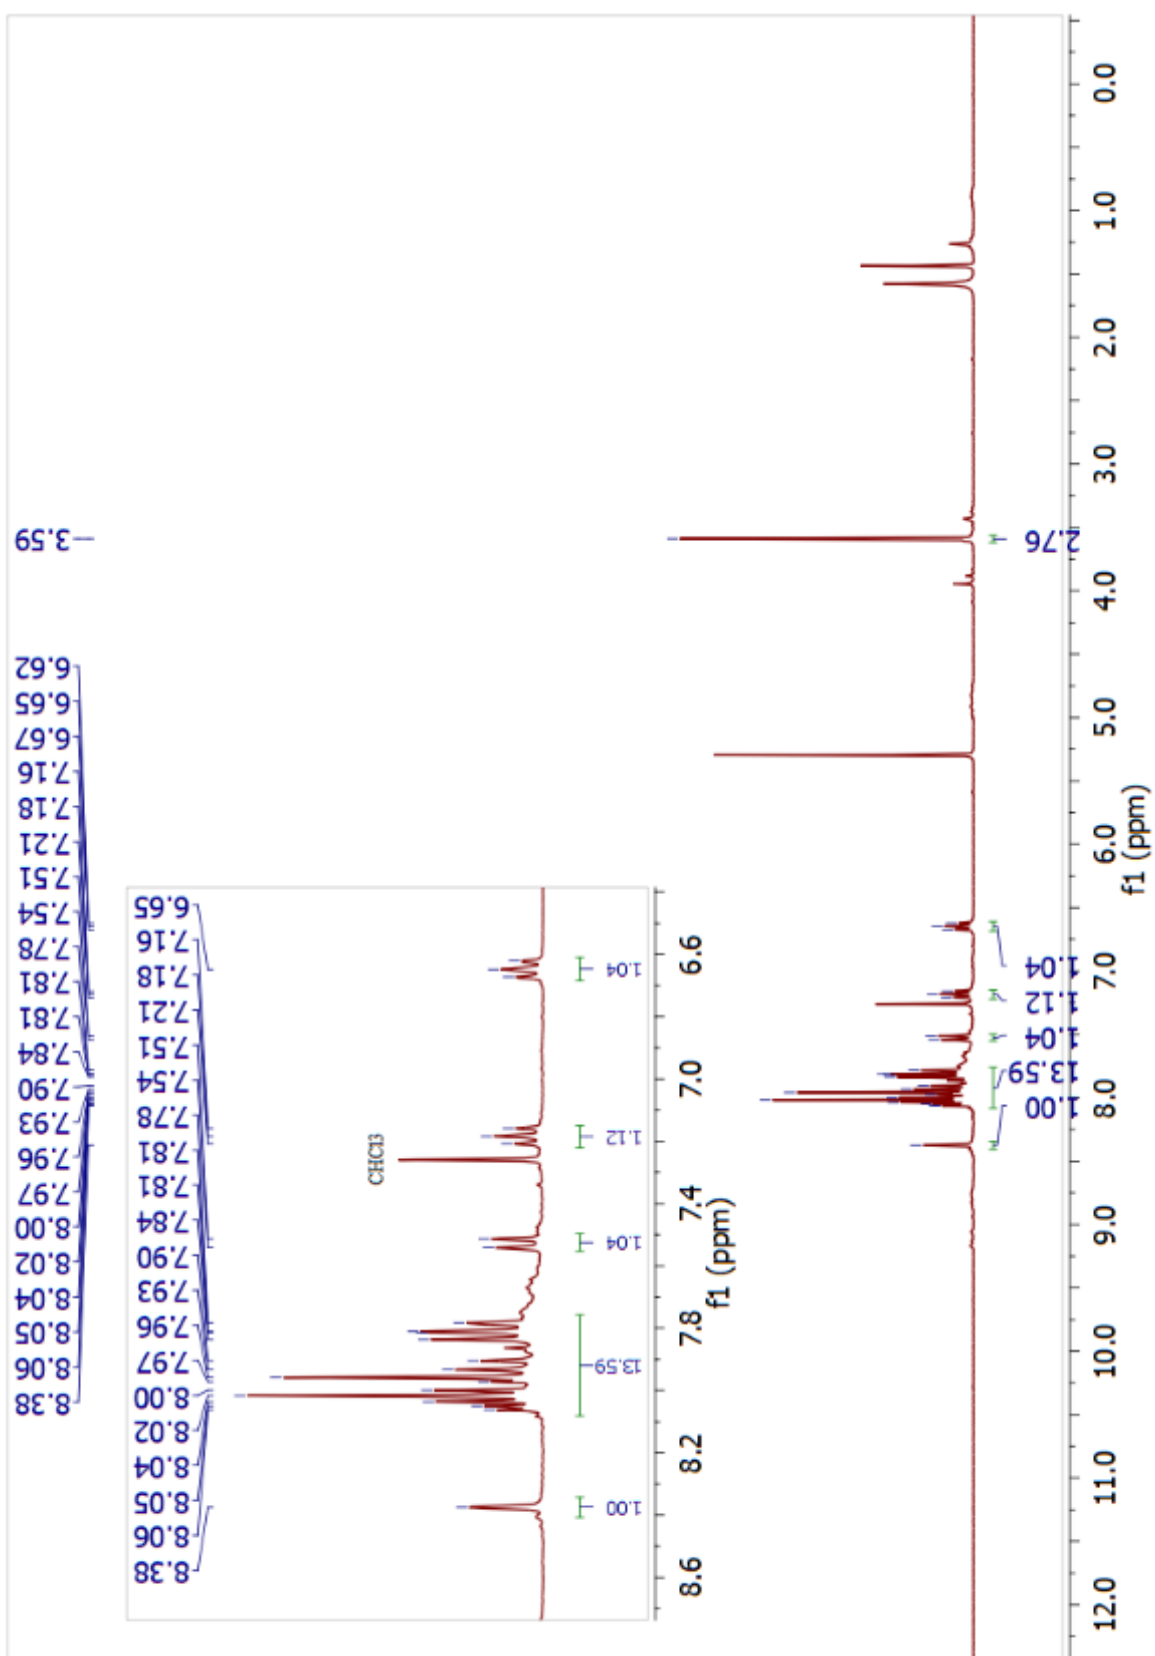

Figure S10.  $^1\text{H}$  NMR (300 MHz,  $\text{CDCl}_3$ ) spectra of Methyl [6]helicene-15-carboxylate.



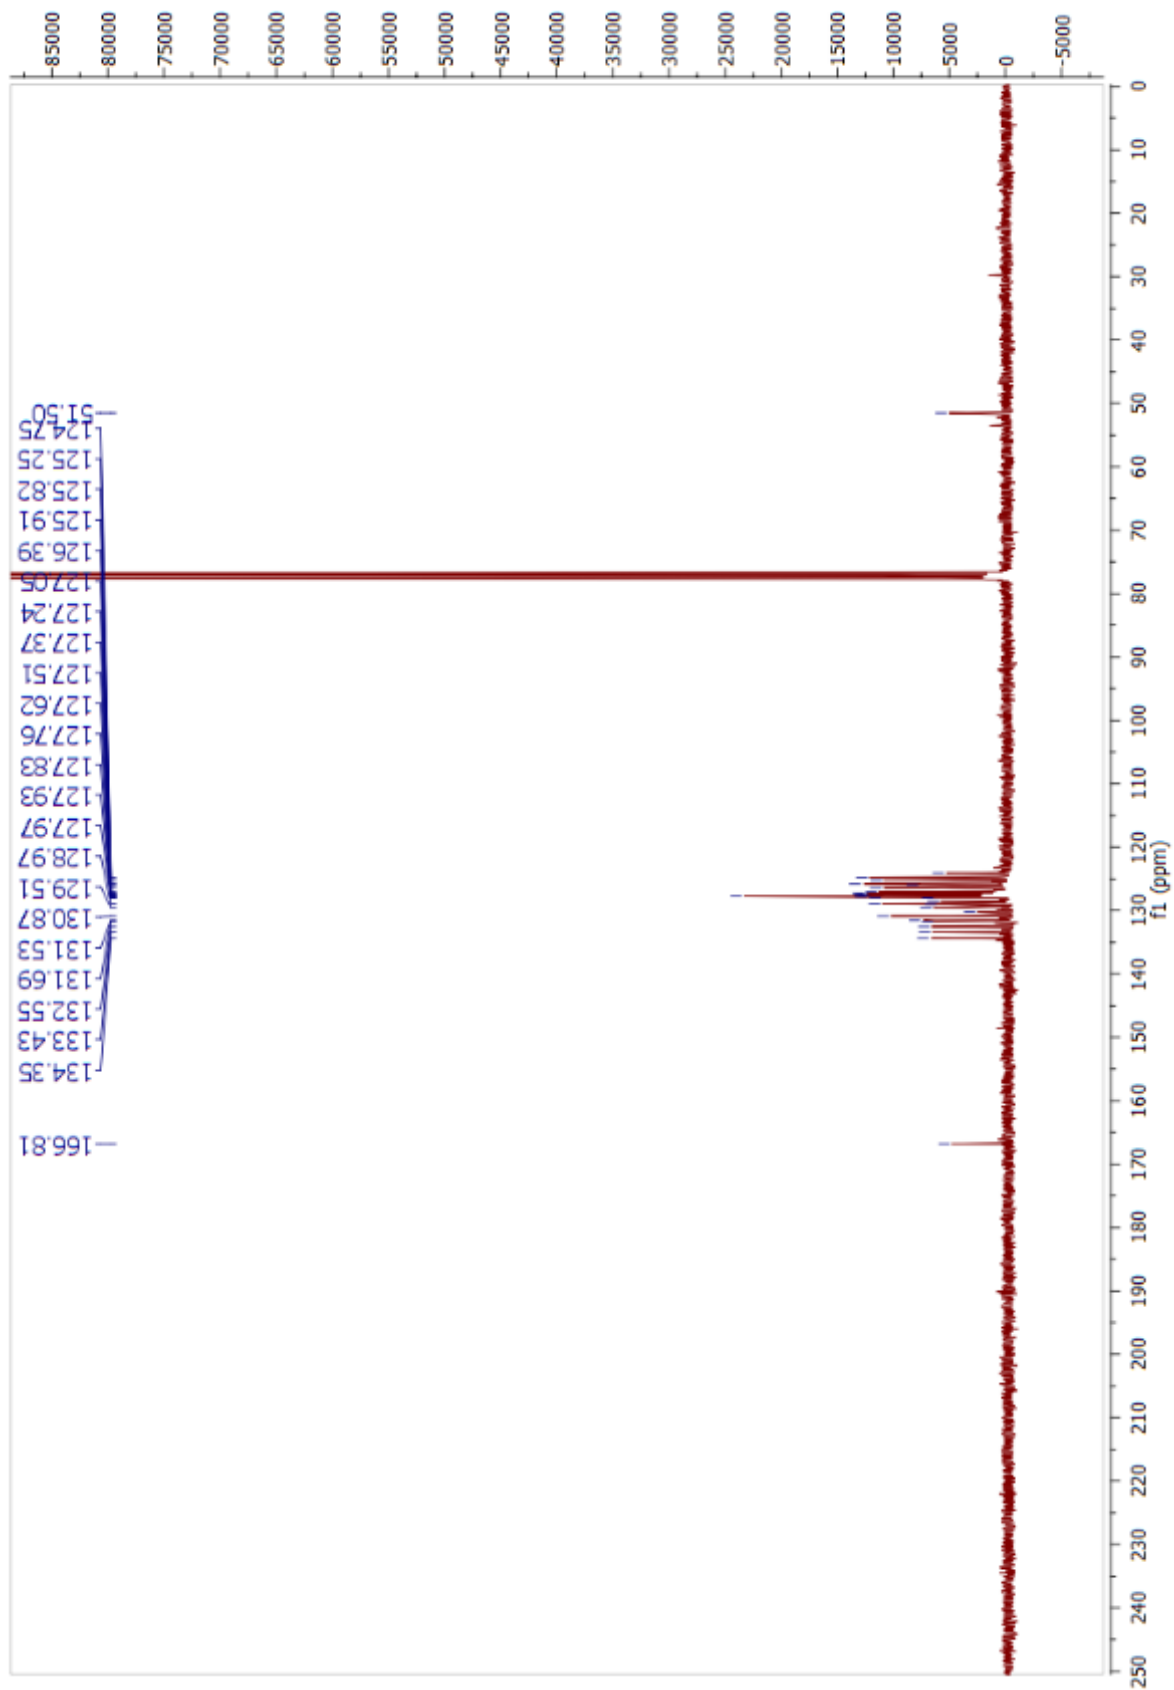

**Figure S11.**  $^{13}\text{C}$  NMR (75 MHz,  $\text{CDCl}_3$ ) spectra of Methyl [6]helicene-15-carboxylate.

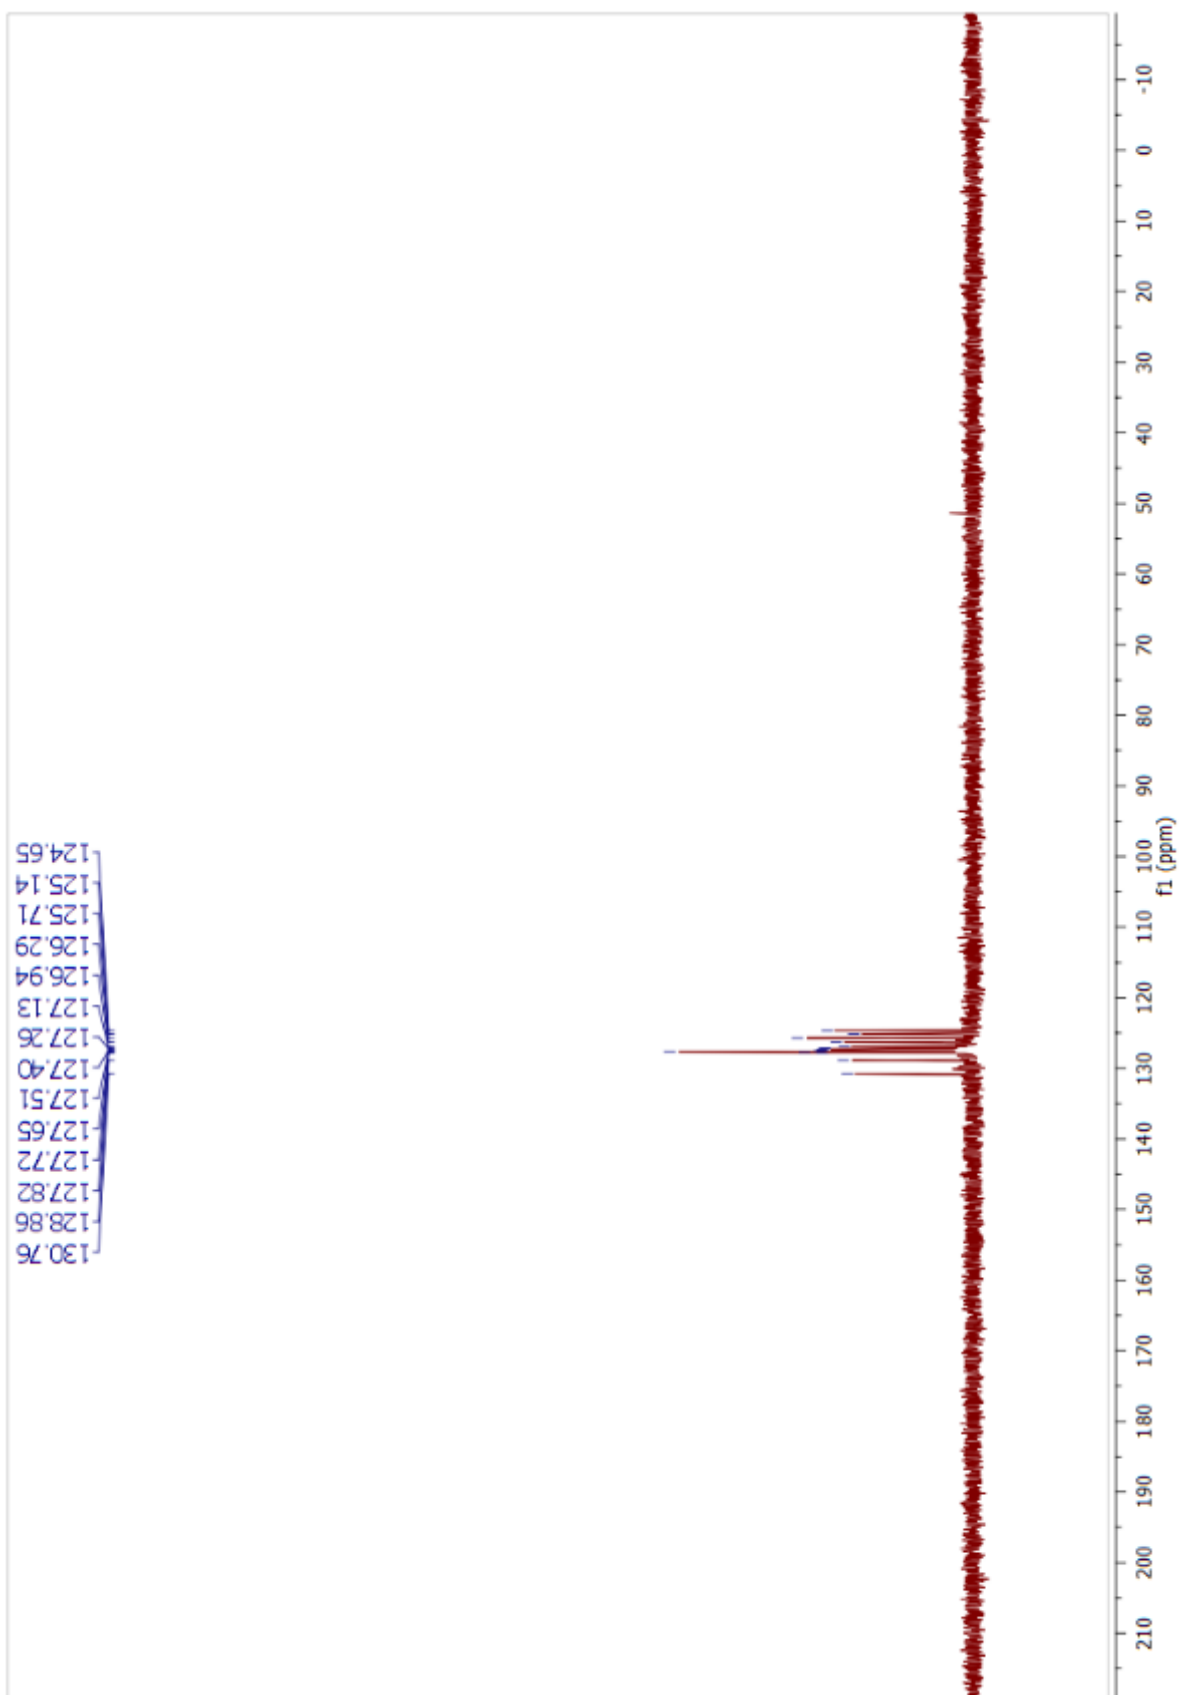

**Figure S12.**  $^{13}\text{C}$ -DEPT135 NMR (75 MHz,  $\text{CDCl}_3$ ) spectra of Methyl [6]helicene-15-carboxylate.

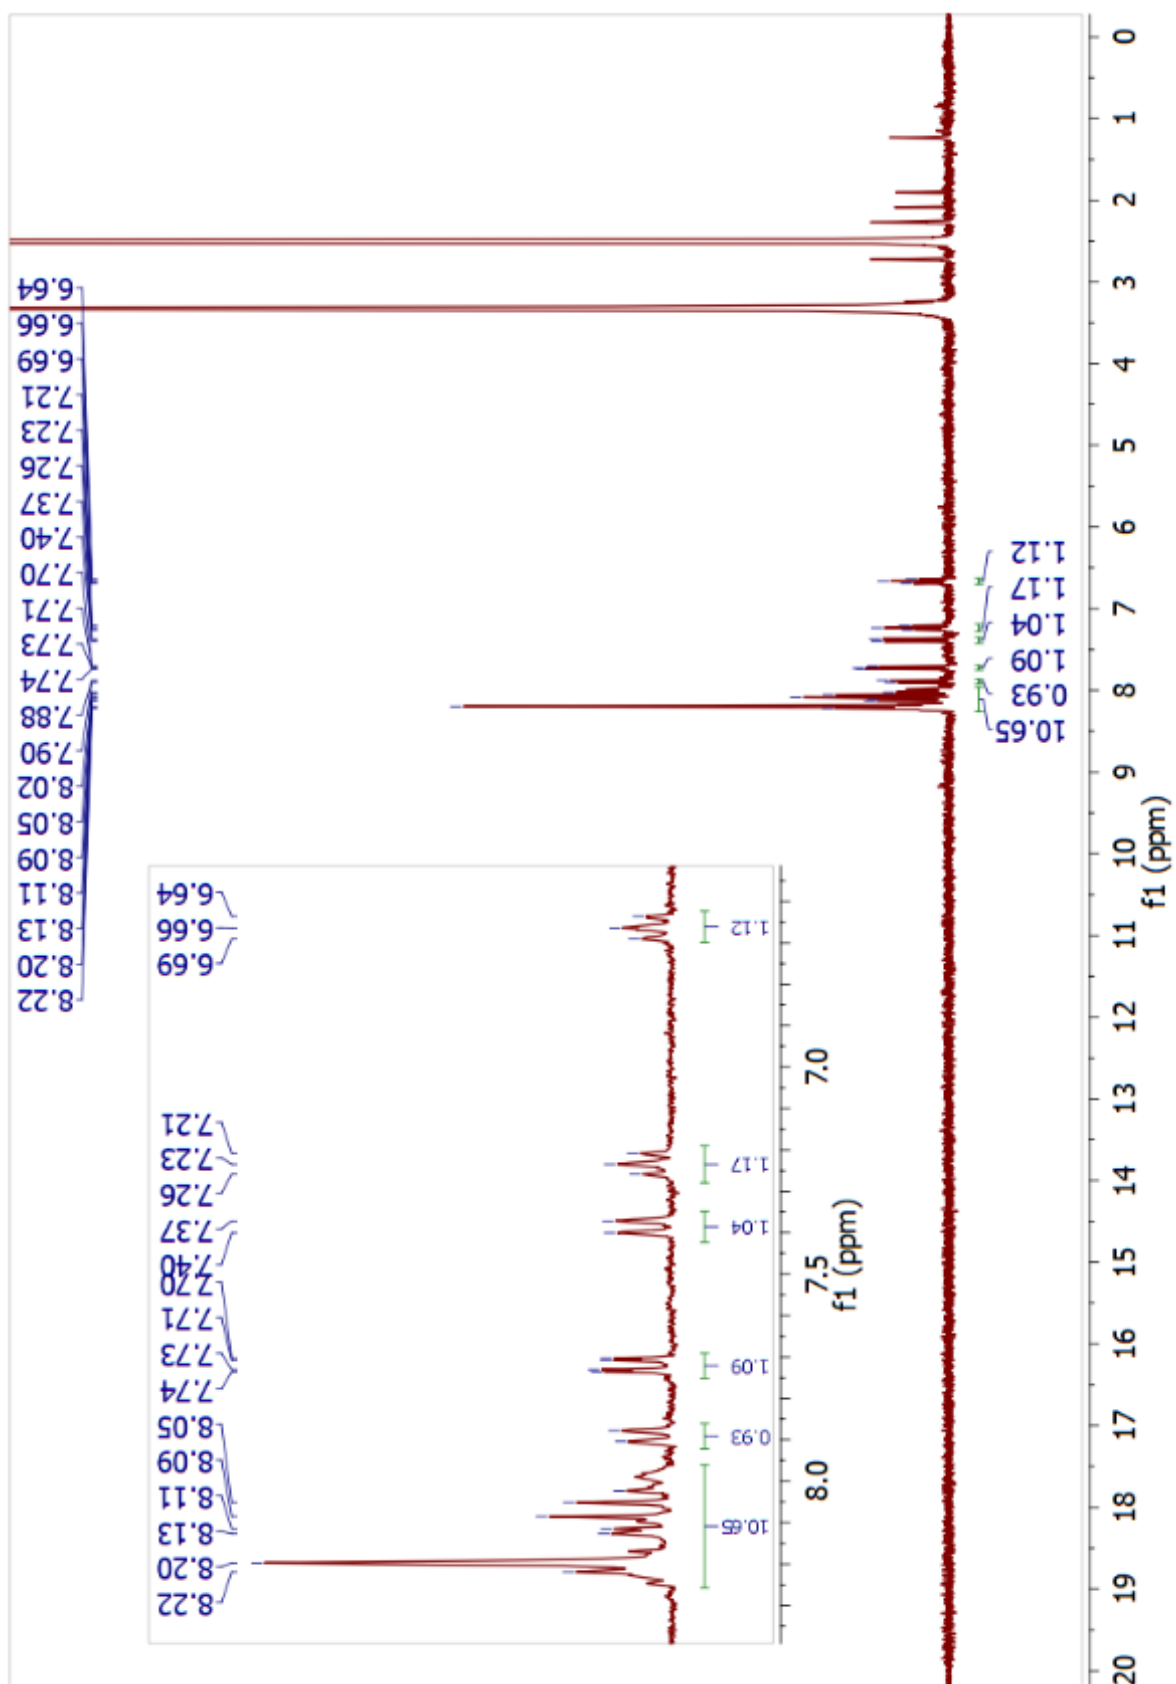

Figure S13.  $^1\text{H}$  NMR (300 MHz,  $\text{DMSO-}d_6$ ) spectra of [6]helicene-15-carboxylic acid H1C.

Analytical chiral HPLC separation for compound Methyl [6]helicene-15-carboxylate

- The sample is dissolved in dichloromethane, injected on the chiral column, and detected with an UV detector and a circular dichroism detector at 254 nm. The flow-rate is 1 mL/min.

| Column       | Mobile Phase                         | t1       | k1   | t2       | k2   | $\alpha$ | Rs   |
|--------------|--------------------------------------|----------|------|----------|------|----------|------|
| Chiralpak ID | Heptane / dichloromethane<br>(60/40) | 6.13 (+) | 1.08 | 7.70 (-) | 1.61 | 1.49     | 4.17 |

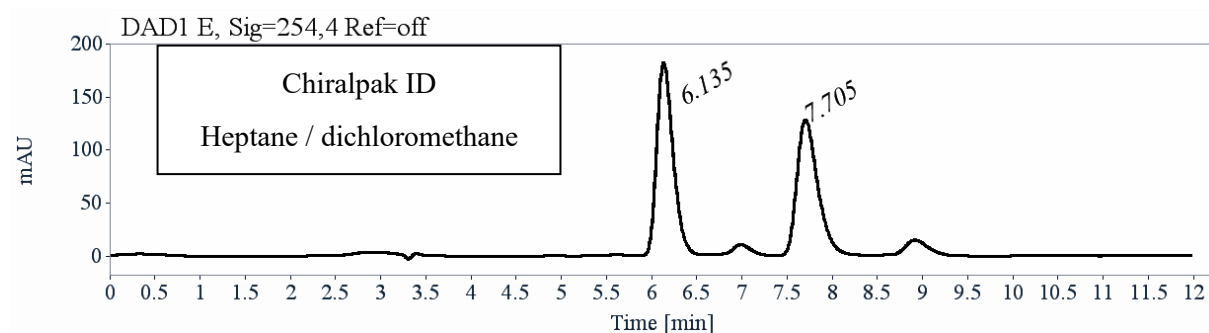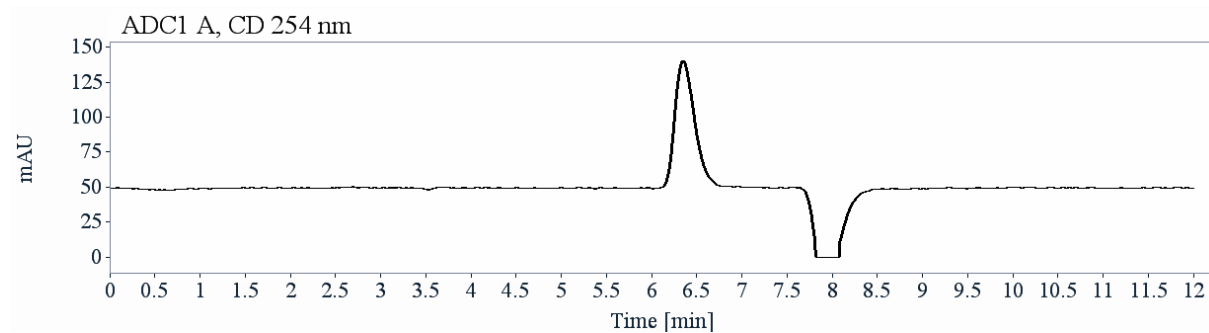

| RT [min] | Area | Area%  | Capacity Factor | Enantioselectivity | Resolution (USP) |
|----------|------|--------|-----------------|--------------------|------------------|
| 6.13     | 2295 | 52.69  | 1.08            |                    |                  |
| 7.70     | 2061 | 47.31  | 1.61            | 1.49               | 4.17             |
| Sum      | 4355 | 100.00 |                 |                    |                  |

### Preparative separation for compound **Methyl [6]helicene-15-carboxylate**:

- Sample preparation: About 98 mg of compound **Methyl [6]helicene-15-carboxylate** are dissolved in 4 mL of dichloromethane.
- Chromatographic conditions: Chiralpak ID (250 x 10 mm), hexane / dichloromethane (60/40) as mobile phase, flow-rate = 5 mL/min, UV detection at 290 nm.
- Injections: 50 times 80  $\mu$ L, every 10 minutes.
- First fraction: 32 mg of the first eluted with ee > 99.5 %

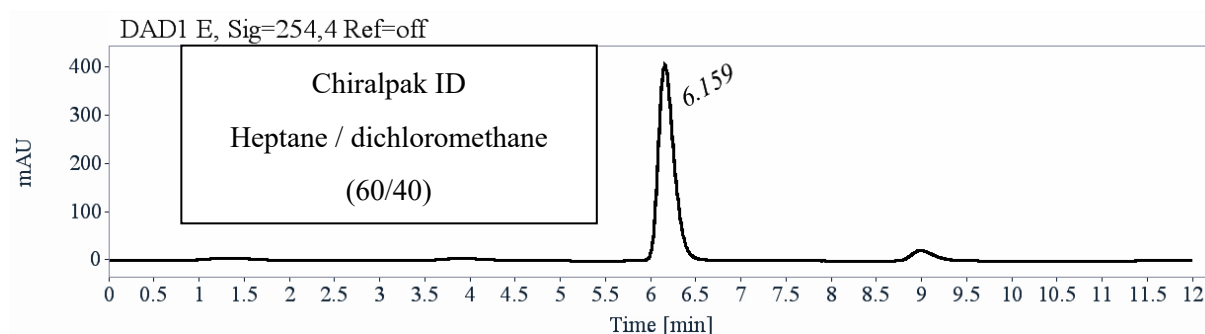

| RT [min] | Area | Area%  |
|----------|------|--------|
| 6.16     | 4902 | 100.00 |
| Sum      | 4902 | 100.00 |

- Second fraction: 35 mg of the second eluted with ee > 99.5 %

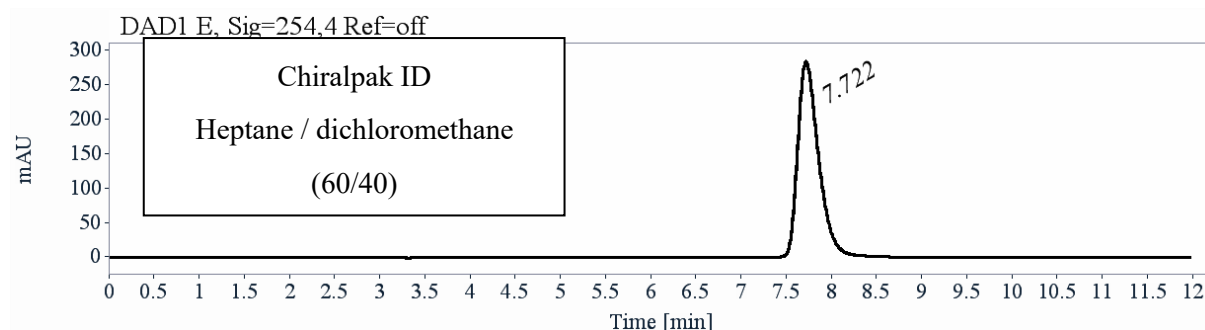

| RT [min] | Area | Area%  |
|----------|------|--------|
| 7.72     | 4507 | 100.00 |
| Sum      | 4507 | 100.00 |

### Optical rotations

Optical rotations were measured on a Jasco P-2000 polarimeter with a halogen lamp (589, 578 and 546 nm), in a 10 cm cell, thermostated at 25°C with a Peltier controlled cell holder.

| $\lambda$ (nm) | first eluted on Chiralpak ID<br>$[\alpha]_{\lambda}^{25}$ (CH <sub>2</sub> Cl <sub>2</sub> , c = 0.15) | second eluted on Chiralpak ID<br>$[\alpha]_{\lambda}^{25}$ (CH <sub>2</sub> Cl <sub>2</sub> , c = 0.10) |
|----------------|--------------------------------------------------------------------------------------------------------|---------------------------------------------------------------------------------------------------------|
| 589            | - 3600                                                                                                 | + 3600                                                                                                  |

|     |        |        |
|-----|--------|--------|
| 578 | - 3800 | + 3800 |
| 546 | - 4800 | + 4800 |

### Electronic Circular Dichroism

ECD and UV spectra were measured on a JASCO J-815 spectrometer equipped with a JASCO Peltier cell holder PTC-423 to maintain the temperature at  $25.0 \pm 0.2^\circ\text{C}$ . A CD quartz cell of 1 mm of optical pathlength was used. The CD spectrometer was purged with nitrogen before recording each spectrum, which was baseline subtracted.

The baseline was always measured for the same solvent and in the same cell as the samples.

The spectra are presented without smoothing and further data processing.

first eluted enantiomer (M): green solid line, concentration =  $0.233 \text{ mmol.L}^{-1}$  in acetonitrile.

second eluted enantiomer (P): red dotted line, concentration =  $0.225 \text{ mmol.L}^{-1}$  in acetonitrile.

Acquisition parameters: 0.1 nm as intervals, scanning speed 50 nm/min, band width 2 nm, and 3 accumulations per sample.

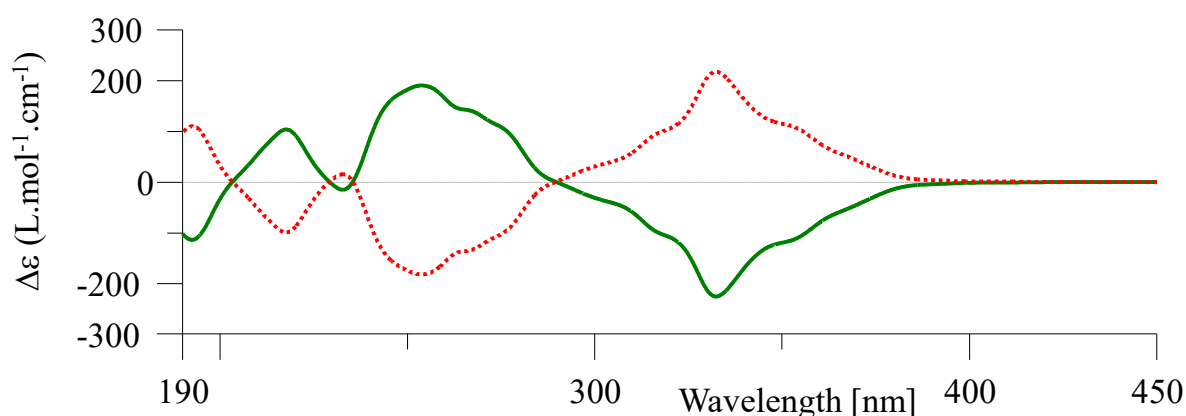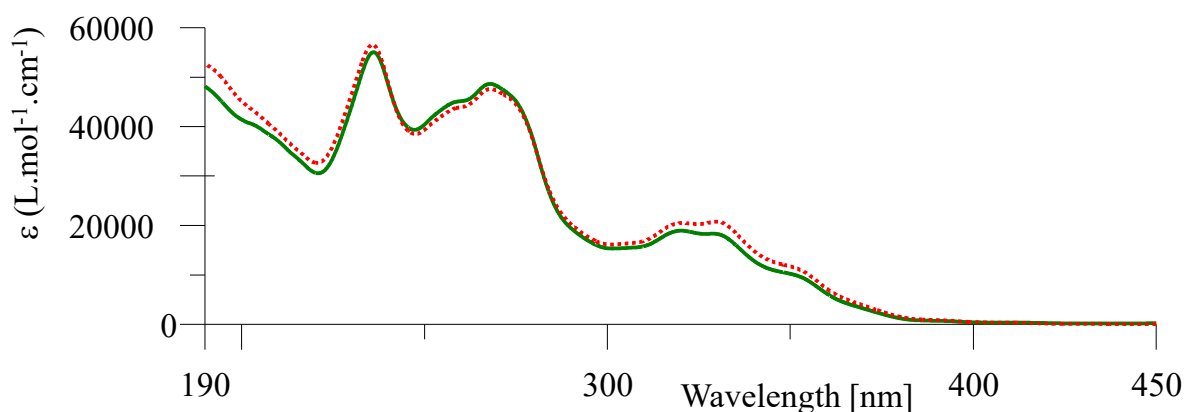

Supplement: d4nr04292a1.pdf [file d4nr04292a1.pdf]
